# Supplementary material
Source: PubMed Central journal article supplement (PMC1562547)

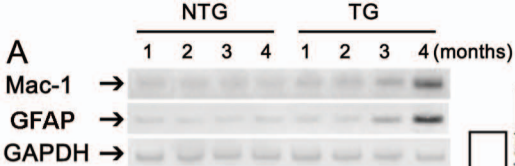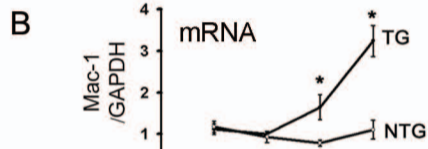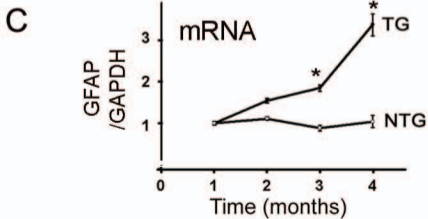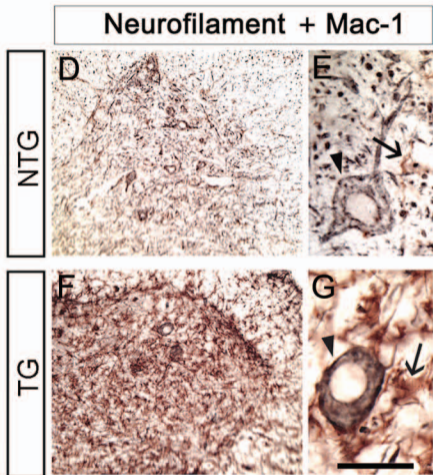

Supplement: pnas_0603670103_1.pdf [file pnas_0603670103_1.pdf]

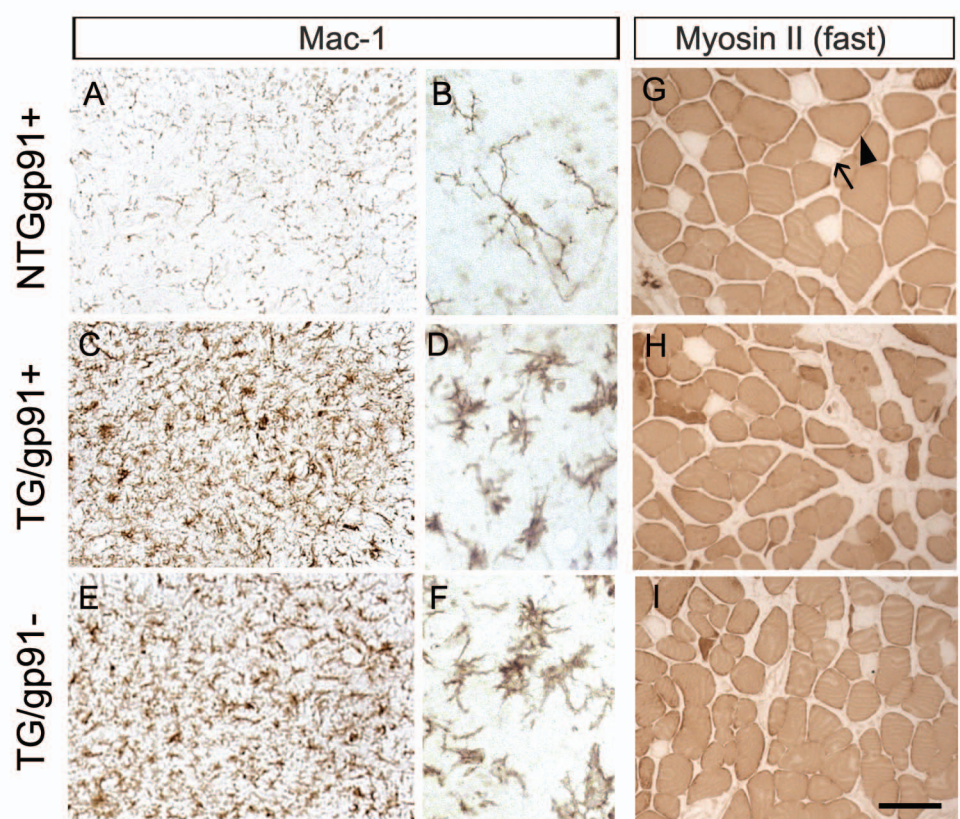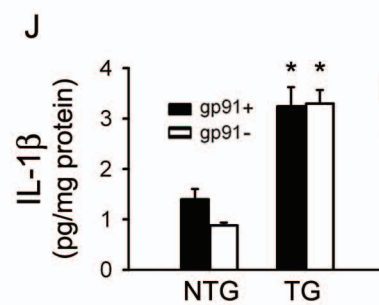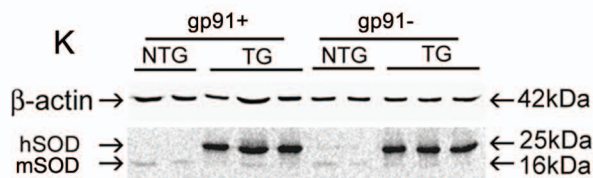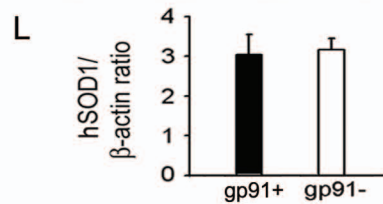

Supplement: pnas_0603670103_2.pdf [file pnas_0603670103_2.pdf]

**IGF-1R $\beta$**

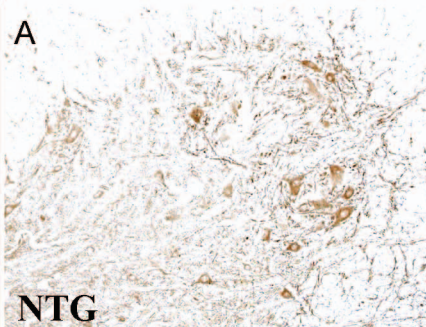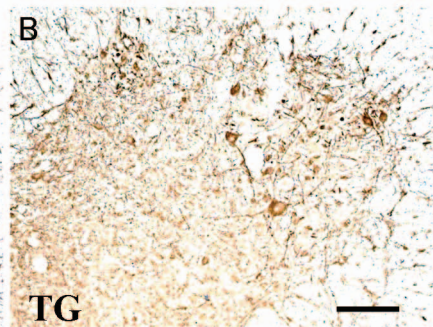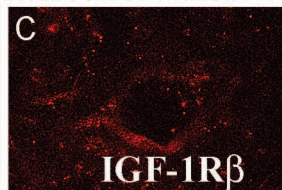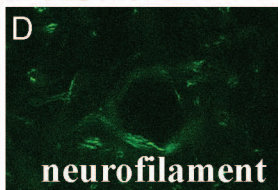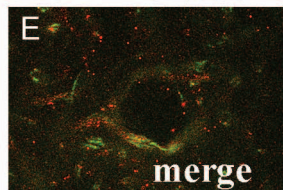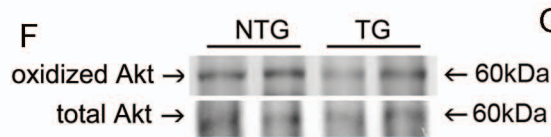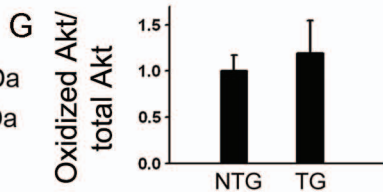

Supplement: pnas_0603670103_3.pdf [file pnas_0603670103_3.pdf]
